# Supplementary material
Source: PubMed Central journal article supplement (PMC3637715)
Supplement: 1221896110_pnas.201221896SI.pdf [file 1221896110_pnas.201221896SI.pdf]

# Supporting Information

Bohannon et al. 10.1073/pnas.1221896110

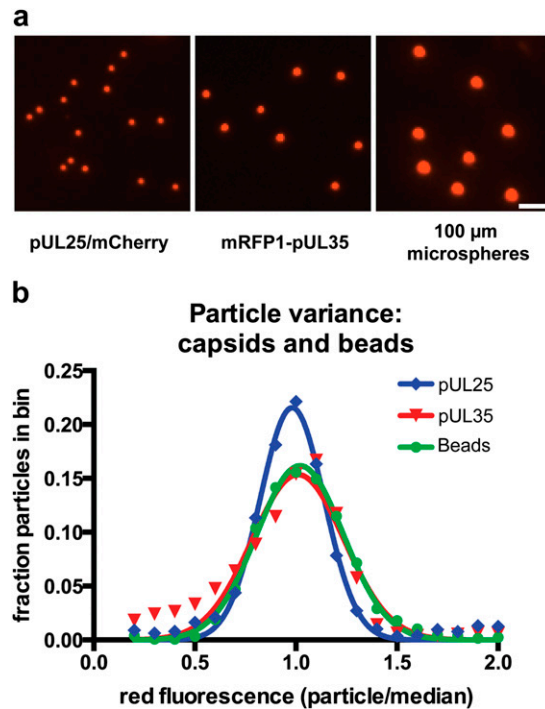

**Fig. S1.** Capsids emit diffraction-limited projections similar to equivalently sized microspheres. (A) Images of 1.5-s exposures of capsids incorporating either pUL25/mCherry (1) or mRFP1-pUL35 protein tags, or 0.1  $\mu\text{m}$  TetraSpeck Microspheres (Life Technologies cat. T7279). Images are equivalently scaled to show relative fluorescence intensities, which appear as larger areas of diffraction despite all particles sharing similar physical size. (Scale bar, 3  $\mu\text{m}$ .) (B) Histogram of red-fluorescent particle intensities of pUL25/mCherry, mRFP1-pUL35, or 0.1- $\mu\text{m}$  microspheres (beads). Each particle intensity was divided by the sample median, plotted as a histogram, and fit to a Gaussian curve by nonlinear regression. More than 1,200 virions or beads were analyzed for each sample. The Gaussian model aligns with the expected outcome of imaging particles with little fluorescence variability, with deviation coming from slight differences in light path, focal plane, and photobleaching during focusing.

1. Bohannon KP, Sollars PJ, Pickard GE, Smith GA (2012) Fusion of a fluorescent protein to the pUL25 minor capsid protein of pseudorabies virus allows live-cell capsid imaging with negligible impact on infection. *J Gen Virol* 93(Pt 1):124–129.

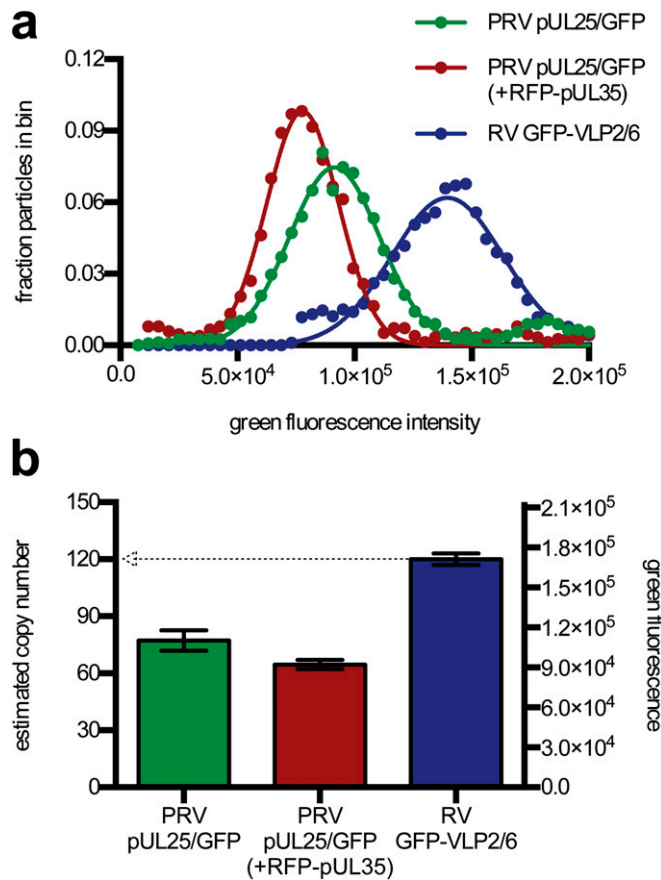

**Fig. S2.** Copy number of pUL25 based on a rotavirus (RV) virus like particle (VLP) standard. (A) Histograms of green fluorescence intensity of diffraction-limited green particles. Bins sizes were selected using the Freedman–Diaconis rule for pseudorabies virus (PRV) pUL25/GFP. Nonlinear regression was used to fit Gaussian curves to the data, where all data fit with  $R^2 > 0.95$ . A peak of very dim debris-like particles (mode =  $1.6 \times 10^4$  arbitrary green fluorescence units) was removed from the RV GFP-VLP2/6 distribution by setting a threshold at  $7.5 \times 10^4$  arbitrary green fluorescence units. (B) Bar graph depicting green fluorescence intensities (right axis) of PRV virions and RV VLPs. Error bars show SEM from three independent experiments. Copy numbers (left axis) were determined by setting the average of RV GFP-VLP2/6–120 copies, which was previously determined by cryo-electron microscopy (cryo-EM) reconstruction.

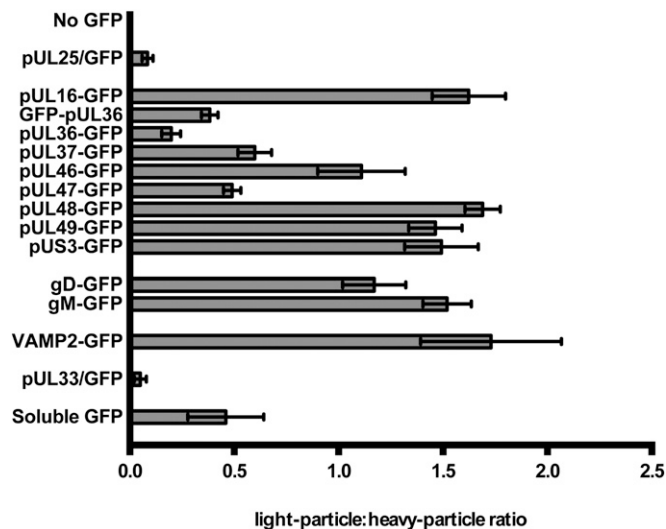

**Fig. S3.** Relative light (L)- and heavy (H)-particle production. H-particles were identified as in Figs. 2 and 3. L-particles were defined as green fluorescent puncta that were brighter than a threshold approximating five molecules of GFP and lacked a red-fluorescent capsid. Error bars represent SEM for  $n \geq 3$  independent experiments.

**Table S1. Strains used in this study**

| Strain     | mRFP1*        | GFP                          | GFP fusion site   | Titer (pfu/mL)    | Source        |
|------------|---------------|------------------------------|-------------------|-------------------|---------------|
| PRV-GS847  | RFP-pUL35     | —                            | —                 | $5.4 \times 10^8$ | (1)           |
| PRV-GS909  | RFP-pUL35     | GFP-pUL36                    | N terminus        | $5.1 \times 10^8$ | (1)           |
| PRV-GS1022 | RFP-pUL35     | pUL37-GFP                    | C terminus        | $4.7 \times 10^8$ | (1)           |
| PRV-GS1046 | RFP-pUL35     | pUL48-GFP                    | C terminus        | $6.7 \times 10^8$ | (1)           |
| PRV-GS1178 | RFP-pUL35     | GFP-gM                       | N terminus        | $1.1 \times 10^8$ | Present study |
| PRV-GS1236 | RFP-pUL35     | GFP-gD                       | N terminus        | $2.1 \times 10^8$ | (2)           |
| PRV-GS1504 | RFP-pUL35     | US3-GFP                      | C terminus        | $1.0 \times 10^8$ | (3)           |
| PRV-GS1903 | RFP-pUL35     | pUL36-GFP                    | C terminus        | $2.2 \times 10^8$ | (4)           |
| PRV-GS2484 | RFP-pUL35     | CMV > GFP <sup>†</sup>       | Soluble           | $2.1 \times 10^8$ | (5)           |
| PRV-GS2795 | RFP-pUL35     | CMV > VAMP2-GFP <sup>†</sup> | C terminus        | $0.8 \times 10^8$ | (6)           |
| PRV-GS3081 | RFP-pUL35     | pUL16-GFP                    | C terminus        | $1.2 \times 10^8$ | Present study |
| PRV-GS3171 | RFP-pUL35     | pUL25/GFP                    | Amino acids 42–43 | $3.1 \times 10^8$ | Present study |
| PRV-GS4078 | RFP-pUL35     | pUL49-GFP                    | C terminus        | $3.6 \times 10^8$ | Present study |
| PRV-GS4127 | RFP-pUL35     | pUL46-GFP                    | C terminus        | $2.3 \times 10^8$ | Present study |
| PRV-GS4379 | —             | pUL25/GFP                    | Amino acids 42–43 | $9.1 \times 10^8$ | (5)           |
| PRV-GS4750 | RFP-pUL35     | pUL33/GFP                    | Amino acids 33–34 | $6.8 \times 10^8$ | Present study |
| PRV-GS4848 | RFP-GFP-pUL35 | RFP-GFP-pUL35                | N terminus        | $0.8 \times 10^8$ | Present study |
| PRV-GS4938 | RFP-pUL35     | pUL47-GFP                    | C terminus        | $3.7 \times 10^8$ | Present study |

\*mRFP1 was fused to the amino terminus of pUL35.

<sup>†</sup>CMV expression cassettes were inserted into the US4 gene.

- Luxton GWG, et al. (2005) Targeting of herpesvirus capsid transport in axons is coupled to association with specific sets of tegument proteins. *Proc Natl Acad Sci USA* 102(16):5832–5837.
- Antinone SE, Smith GA (2006) Two modes of herpesvirus trafficking in neurons: Membrane acquisition directs motion. *J Virol* 80(22):11235–11240.
- Coller KE, Smith GA (2008) Two viral kinases are required for sustained long distance axon transport of a neuroinvasive herpesvirus. *Traffic* 9(9):1458–1470.
- Leelawong M, Lee JI, Smith GA (2012) Nuclear egress of pseudorabies virus capsids is enhanced by a subspecies of the large tegument protein that is lost upon cytoplasmic maturation. *J Virol* 86(11):6303–6314.
- Bohannon KP, Sollars PJ, Pickard GE, Smith GA (2012) Fusion of a fluorescent protein to the pUL25 minor capsid protein of pseudorabies virus allows live-cell capsid imaging with negligible impact on infection. *J Gen Virol* 93(Pt 1):124–129.
- Antinone SE, Zaichick SV, Smith GA (2010) Resolving the assembly state of herpes simplex virus during axon transport by live-cell imaging. *J Virol* 84(24):13019–13030.

**Table S2. Primers used to construct PRV recombinants unique to this study**

| Strain | PCR template | Primer pairs                                                                                                                             |
|--------|--------------|------------------------------------------------------------------------------------------------------------------------------------------|
| GS1178 | pGreenFKF    | 5'-CACCTTATCTTCGCTCGCTCCCGAAATGGGGTCCCGGTGAGCAAGGGCGAGG<br>5'-TGTCGTAGTCGGCCACGGTCGCGTAAAAGCACGGGAACCTGAACCGCCCGAGAAGTTCC                |
| GS3081 | pEP-EGFP-in  | 5'-CCCCGCCGCGCCATCCCGAGCTAATAAAGCATTATGTGAGCAAGGGCGAG,<br>5'-GCCACAATAACAACGCAAGTACCCATTTTTTTCATTTCACTTGTACAGCTCGTC                      |
| GS3171 | pEP-EGFP-in  | 5'-CTGGGCCCCCGGGCTTCAGCGAGGGCTCGACGCGCGTGTGAGCAAGGGCGAGGAG,<br>5'-CGGCCGCGCGCGCGCGCTTCGCGTGCGCCAGCGCGAGCTTGTACAGCTCGTCCATGC              |
| GS4078 | pEP-EGFP-in  | 5'-GGACGAGAGCACCCCGGGCGGAAGGGAAAAGTGTATAAAGTGTGAGCAAGGGCGAGGAG,<br>5'-CAGCGGACGACTGAGCGGGGTGCCATTTGCAACGCCTTACTTGTACAGCTCGTCCATGC        |
| GS4127 | pEP-EGFP-in  | 5'-GCCGCCCCGGGCGCGCTAACCCGCCTCTGCTCCGCCATGGTGTGAGCAAGGGCGAGGAG,<br>5'-CCTCCACGAAGCGCGGGCGCTTCTCGGGCGCGGGAGCTTGTACAGCTCGTCCATGC           |
| GS4750 | pEP-EGFP-in  | 5'-CTGCGCGACTTCGACGTGGACTTTCTCGAGGCCAACTACGTGAGCAAGGGCGAGGAG,<br>5'-CATCACGTCTCGAACCAGACGCGCACCCCGGGGCGAGCTTGTACAGCTCGTCCATGC            |
| GS4848 | pEP-EGFP-in  | 5'-GGAACAGTACGAGCGCGCGAGGGCCCACTCCACCGCGGAGGTGGCGTGTGAGCAAGGGCGAGGAG,<br>5'-TCTGCGGGTATCGTCCGGGATTGTTCCGGTCTGAAGGACTTGTACAGCTCGTCCATGCCG |
| GS4938 | pEP-EGFP-in  | 5'-CCGAGCGCATTATCGGCGCGCGGCCCGCCCGGGCGCGGTGCGGAGGTGGTGTGAGCAAGGGCGAGGAG<br>5'-CTCGGGCGCGCGGAGCATGGCGGAGGAGGCGGGTACTTGTACAGCTCGTCCATGC    |

Underlined sequences share homology to template plasmid.
